# Supplementary material for: A Recalibrated Molecular Clock and Independent Origins for the Cholera Pandemic Clones
Source: PLOS journal article supplement (doi:10.1371/journal.pone.0004053), 2008-12-29
Supplement: S3 (10.1371/journal.pone.0004053.s003) [file journal.pone.0004053.s003]

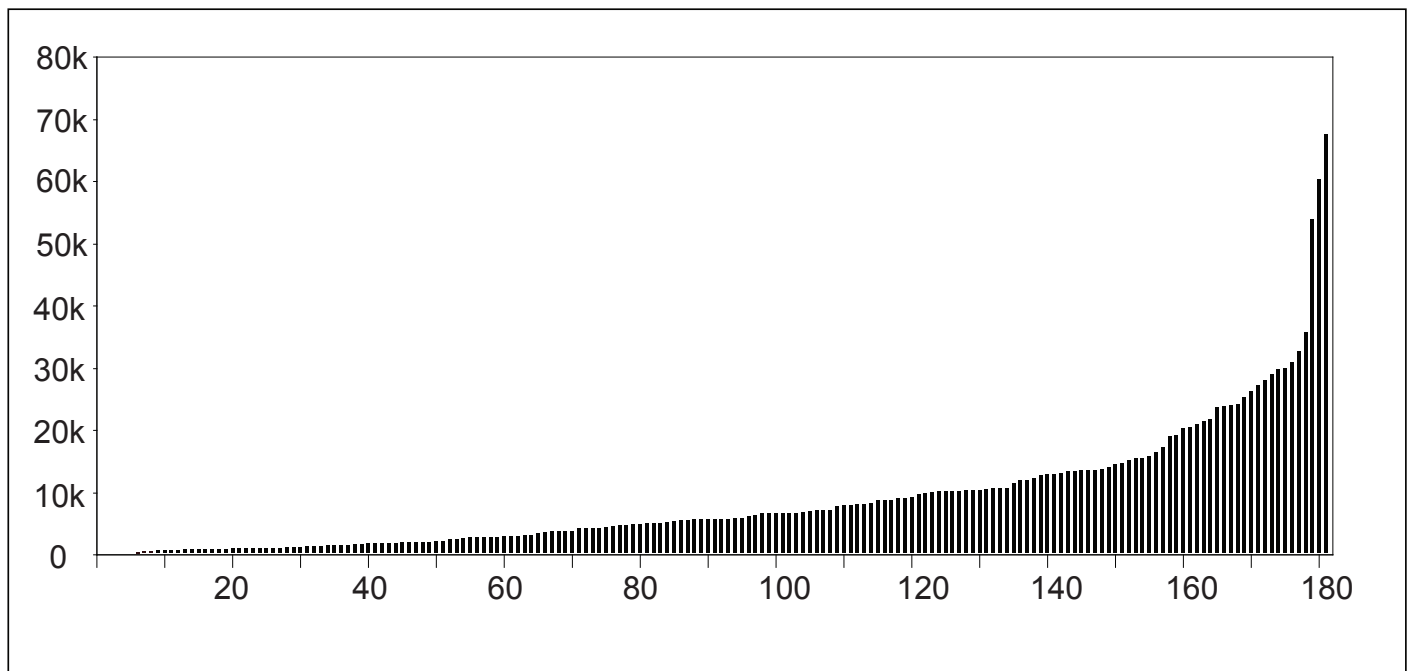

**Figure S2. Histogram of the lengths of recombinant segments.**

The 181 recombinant segments in the 3 genomes, determined as described in Supporting Methods, were plotted in the figure. Each column represents one recombinant segment, sorted from the smallest to the largest by size. Y-axis is the size of recombinant segments.
