# Supplementary material for: A Recalibrated Molecular Clock and Independent Origins for the Cholera Pandemic Clones
Source: PLOS journal article supplement (doi:10.1371/journal.pone.0004053), 2008-12-29
Supplement: S7 (10.1371/journal.pone.0004053.s007) [file journal.pone.0004053.s007]

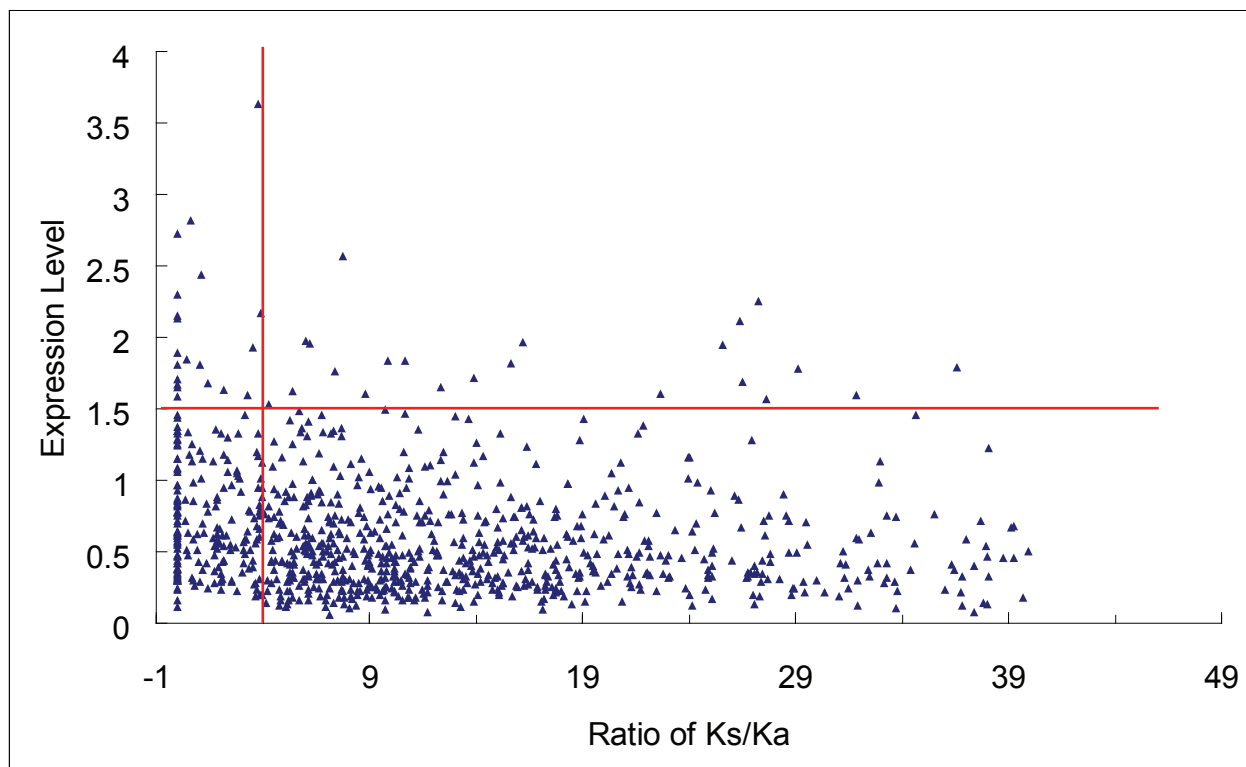

**Figure S6. Correlation of gene expression level with ratio of synonymous and non-synonymous substitution rates.**

Synonymous (Ks) and non-synonymous (Ka) substitution rates were determined for each gene from recombinant regions (Table 1). The *in vivo* data was from Bina et al. [1]. Statistically significant correlation was found between Ks/Ka and expression level (Spearman rank correlation,  $r = -0.146$ ,  $P = 0.0001$ ). Genes were further divided into 2 groups by the expression level (above and below 1.5) and the Ks/Ka ratios ( $< 4.0$  and  $\geq 4.0$ ) as shown by the horizontal and vertical lines respectively. The division is statistically significant ( $P = 0.027$ , Fisher's exact test).

1. Bina J, Zhu J, Dziejman M, Faruque S, Calderwood S, et al. (2003) ToxR regulon of *Vibrio cholerae* and its expression in vibrios shed by cholera patients. *Proc Natl Acad Sci U S A* 100: 2801-2806.
