# Supplementary material for: A Recalibrated Molecular Clock and Independent Origins for the Cholera Pandemic Clones
Source: PLOS journal article supplement (doi:10.1371/journal.pone.0004053), 2008-12-29
Supplement: S11 (10.1371/journal.pone.0004053.s011) [file journal.pone.0004053.s011]

**Table S3. Pseudogenes allocated to the M66-2, , N16961, MN and O395 lineages\***

| M66-2                              | N16961            | O395        | gene name | function                                                        |
|------------------------------------|-------------------|-------------|-----------|-----------------------------------------------------------------|
| <b>MNO lineage</b>                 |                   |             |           |                                                                 |
| VC66-2_0242                        | VC0254            | VC395_0286  |           | conserved hypothetical protein                                  |
| VC66-2_0776                        | VC0818            | VC395_0835  |           | transposase, putative                                           |
| VC66-2_0803                        | VC0846            | VC395_0862  |           | integrase, degenerate                                           |
| VC66-2_1698                        | VC1759            | VC395_1874  |           | integrase, truncation                                           |
| VC66-2_1730                        | VC1807            | VC395_1922  |           | conserved hypothetical protein                                  |
| VC66-2_2620                        | VC2700            | VC395_2813  | pulA      | pullulanase                                                     |
| <b>MN lineage</b>                  |                   |             |           |                                                                 |
| VC66-2_1470                        | VC1529 (VC1528)   | VC395_1647  |           | hypothetical protein                                            |
| VC66-2_1629                        | VC1690 (VC1689)   | VC395_1808  | GalA      | Alpha-galactosidase                                             |
| VC66-2_A0847                       | VCA0887           | VC395_A0912 |           | Putative intracellular protease/amidase                         |
| <b>M lineage</b>                   |                   |             |           |                                                                 |
| VC66-2_0182                        | VC0194            | VC395_0226  | ggt       | gamma-glutamyltranspeptidase                                    |
| VC66-2_0200                        | VC0212            | VC395_0244  | msbB      | lipid A biosynthesis (kdo)2-(lauroyl)-lipid IVA acyltransferase |
| VC66-2_0227                        | VC0239            | VC395_0271  |           | conserved hypothetical protein                                  |
| VC66-2_0559                        | VC0601            | VC395_0618  | hrpB      | ATP-dependent helicase HrpB                                     |
| VC66-2_0658                        | VC0700            | VC395_0717  | slt       | soluble lytic murein transglycosylase                           |
| VC66-2_1041                        | VC1085            | VC395_1100  |           | sensor histidine kinase                                         |
| VC66-2_1242                        | VC1287            | VC395_1406  | mdoH      | periplasmic glucans biosynthesis protein MdoH                   |
| VC66-2_1888                        | VC1964            | VC395_2079  |           | hypothetical protein                                            |
| VC66-2_1889                        | VC1965            | VC395_2080  |           | hypothetical protein                                            |
| VC66-2_1994                        | VC2070            | VC395_2185  | sixA      | phosphohistidine phosphatase                                    |
| VC66-2_2309*                       | VC2386            | VC395_2501* |           | conserved hypothetical protein                                  |
| VC66-2_A0071                       | VCA0074           | VC395_A0067 |           | GGDEF family protein                                            |
| VC66-2_A0274(VC66-2_A0271) VCA0275 |                   | VC395_A0312 |           | IS1004                                                          |
| <b>N lineage</b>                   |                   |             |           |                                                                 |
| VC66-2_0243                        | VC0258 (VC0255)   | VC395_0287  |           | rfbT-related protein                                            |
| VC66-2_0269                        | VC0284            | VC395_0313  |           | TonB system receptor                                            |
| VC66-2_0541                        | VC0583            | VC395_0600  | hapR      | hemagglutinin/protease regulatory protein                       |
| VC66-2_0779                        | VC0822 (VC0821)*  | VC395_0838* |           | hypothetical protein                                            |
| VC66-2_1560                        | VC1620            | VC395_1738  |           | RTX toxin                                                       |
| VC66-2_A0131                       | VCA0133           | VC395_A0126 | pnuC      | pnuC protein                                                    |
| VC66-2_A0939                       | VCA0979 (VCA0980) | VC395_A1004 |           | methyl-accepting chemotaxis protein                             |
| <b>O lineage</b>                   |                   |             |           |                                                                 |
| VC66-2_0293                        | VC0308            | VC395_0352  |           | hypothetical protein                                            |

|              |                  |                        |        |                                                  |
|--------------|------------------|------------------------|--------|--------------------------------------------------|
| VC66-2_0397  | VC0412           | VC395_0456             |        | hypothetical protein                             |
| VC66-2_0779  | VC0822 (VC0821)* | VC395_0838*            |        | hypothetical protein                             |
| VC66-2_0878  | VC0921           | VC395_0937             |        | polysaccharide export protein, putative          |
| VC66-2_1029  | VC1073           | VC395_1088             |        | chitinase, putative                              |
| VC66-2_1061  | VC1105           | VC395_1120             |        | conserved hypothetical protein                   |
| VC66-2_1123  | VC1168           | VC395_1234(VC395_1287) | gltP-1 | proton/glutamate symporter                       |
| VC66-2_1329  | VC1374           | VC395_1493             |        | DnaK-related protein                             |
| VC66-2_1330  | VC1375           | VC395_1494             |        | hypothetical protein                             |
| VC66-2_1404  | VC1448           | VC395_1568             | rtxB   | RTX toxin transporter                            |
| VC66-2_1407  | VC1451           | VC395_1569             | rtxA   | RTX toxin RtxA                                   |
| VC66-2_1435  | VC1492           | VC395_1612             |        | conserved hypothetical protein                   |
| VC66-2_1539  | VC1599           | VC395_1715             |        | GGDEF family protein                             |
| VC66-2_1554  | VC1614           | VC395_1730(VC395_1732) |        | conserved hypothetical protein                   |
| VC66-2_1589  | VC1650           | VC395_1767             | vcc    | collagenase                                      |
| VC66-2_1653  | VC1713           | VC395_1830             |        | transcriptional regulator, AsnC family           |
| VC66-2_1763  | VC1840           | VC395_1955             |        | conserved hypothetical protein                   |
| VC66-2_2309* | VC2386           | VC395_2501             |        | conserved hypothetical protein                   |
| VC66-2_A0105 | VCA0107          | VC395_A0100            |        | conserved hypothetical protein                   |
| VC66-2_A0112 | VCA0114          | VC395_A0107            |        | conserved hypothetical protein                   |
| VC66-2_A0118 | VCA0120          | VC395_A0113            |        | IcmF-related protein                             |
| VC66-2_A0144 | VCA0146          | VC395_A0139            |        | Putative TRAP transporter large permease protein |
| VC66-2_A0193 | VCA0197          | VC395_A0236            | guaC   | GMP reductase                                    |
| VC66-2_A0215 | VCA0219          | VC395_A0256            | hlyA   | haemolysin                                       |
| VC66-2_A0255 | VCA0258          | VC395_A0296            |        | conserved hypothetical protein                   |
| VC66-2_A0483 | VCA0524          | VC395_A0800            |        | conserved hypothetical protein                   |
| VC66-2_A0807 | VCA0848          | VC395_A0872            |        | GGDEF family protein                             |
| VC66-2_A0855 | VCA0895          | VC395_A0920            |        | chemotactic transducer-related protein           |
| VC66-2_A0922 | VCA0962          | VC395_A0987            |        | conserved hypothetical protein                   |
| VC66-2_A1059 | VCA1102          | VC395_A1123            |        | conserved hypothetical protein                   |

Note:

Pseudogenes in the major integron are not included in this table

VC66-2\_2309\* and its equivalent in O395 are independently inactivated in M66-2 and O395

VC0822 (VC0821)\* and its equivalent in O395 are independently inactivated in N16961 and O395
