# Supplementary material for: A Recalibrated Molecular Clock and Independent Origins for the Cholera Pandemic Clones
Source: PLOS journal article supplement (doi:10.1371/journal.pone.0004053), 2008-12-29
Supplement: S15 (10.1371/journal.pone.0004053.s015) [file journal.pone.0004053.s015]

**Table S7. Genes in recombinant segments with protein product having ks/ka less than 4**

| <b>O395</b> | <b>gene name</b> | <b>Function</b>                                          | <b>rec*</b> | <b>ks/ka</b> | <b>expression data†</b> |
|-------------|------------------|----------------------------------------------------------|-------------|--------------|-------------------------|
| VC395_0130  |                  | DNA topoisomerase I-related protein                      | M           | 0.70         | 0.32                    |
| VC395_0129  | purK             | phosphoribosylaminoimidazole carboxylase, ATPase subunit | M           | 3.64         | 0.19                    |
| VC395_0127  |                  | conserved hypothetical protein                           | M           | 0.00         | 0.42                    |
| VC395_0212  |                  | conserved hypothetical protein                           | O           | 3.54         | 1.93                    |
| VC395_0221  |                  | conserved hypothetical protein                           | M           | 0.00         | 0.34                    |
| VC395_0223  |                  | Threonine efflux protein                                 | M           | 3.89         | 2.17                    |
| VC395_0237  |                  | conserved hypothetical protein                           | MO          | 3.71         | 0.68                    |
| VC395_0257  |                  | putative lipopolysaccharide biosynthesis protein         | O           | 3.41         | 0.78                    |
| VC395_0262  |                  | conserved hypothetical protein                           | O           | 0.00         | 1.25                    |
| VC395_0293  |                  | conserved hypothetical protein                           | O           | 0.00         | 1.65                    |
| VC395_0303  |                  | conserved hypothetical protein                           | O           | 3.80         | 3.63                    |
| VC395_0308  |                  | conserved hypothetical protein                           | O           | 0.63         | 2.82                    |
| VC395_0360  |                  | conserved hypothetical protein                           | O           | 0.00         | 1.24                    |
| VC395_0418  |                  | conserved hypothetical protein                           | O           | 2.14         | 0.54                    |
| VC395_0424  |                  | conserved hypothetical protein                           | O           | 0.00         | #N/A                    |
| VC395_0425  |                  | conserved hypothetical protein                           | O           | 2.16         | 1.18                    |
| VC395_0563  |                  | conserved hypothetical protein                           | O           | 0.00         | 0.75                    |
| VC395_0614  | sfsA             | sugar fermentation stimulation protein                   | O           | 2.19         | 0.43                    |
| VC395_0615  |                  | conserved hypothetical protein                           | O           | 0.72         | 0.98                    |
| VC395_0617  |                  | conserved hypothetical protein                           | O           | 2.84         | 1.03                    |
| VC395_0650  | ompU             | outer membrane protein OmpU                              | O           | 0.00         | 0.47                    |
| VC395_0678  |                  | conserved hypothetical protein                           | O           | 3.59         | 0.73                    |

|            |      |                                                 |    |      |      |
|------------|------|-------------------------------------------------|----|------|------|
| VC395_0687 |      | conserved hypothetical protein                  | O  | 0.00 | 1.81 |
| VC395_0698 | ribF | riboflavin kinase/FMN adenylyltransferase       | O  | 3.51 | 0.43 |
| VC395_0703 |      | conserved hypothetical protein                  | O  | 2.06 | 1.32 |
| VC395_0718 |      | trp operon repressor, putative                  | O  | 3.39 | 0.51 |
| VC395_0724 |      | conserved hypothetical protein                  | O  | 0.00 | 1.08 |
| VC395_0750 |      | conserved hypothetical protein                  | O  | 1.64 | 1.13 |
| VC395_0754 |      | putative acetoin utilization protein            | O  | 1.84 | 0.86 |
| VC395_0755 |      | conserved hypothetical protein                  | O  | 0.00 | 0.86 |
| VC395_0757 |      | conserved hypothetical protein                  | O  | 0.00 | 0.81 |
| VC395_0771 |      | conserved hypothetical protein                  | MO | 2.80 | 1.04 |
| VC395_0774 |      | conserved hypothetical protein                  | MO | 2.06 | 0.35 |
| VC395_0782 |      | conserved hypothetical protein                  | O  | 0.00 | 0.87 |
| VC395_0783 | xseA | exodeoxyribonuclease VII, large subunit         | O  | 0.00 | 0.56 |
| VC395_0814 | citD | citrate lyase, gamma subunit                    | O  | 2.90 | 1.01 |
| VC395_0817 | citX | citX protein                                    | O  | 0.00 | 0.78 |
| VC395_0837 | tagA | ToxR-activated gene A protein                   | O  | 1.74 | 0.47 |
| VC395_0840 | tagD | tagD protein                                    | O  | 3.95 | 0.88 |
| VC395_0841 | tcpI | toxin co-regulated pilus biosynthesis protein I | O  | 3.72 | 0.23 |
| VC395_0842 | tcpP | toxin co-regulated pilus biosynthesis protein P | O  | 1.41 | 0.78 |
| VC395_0906 | ispA | geranyltranstransferase                         | N  | 0.00 | 0.47 |
| VC395_0919 | syd  | syd protein                                     | O  | 0.72 | 0.58 |
| VC395_0953 |      | conserved hypothetical protein                  | N  | 0.58 | 1.17 |
| VC395_0959 | lipB | lipoate-protein ligase B                        | N  | 1.23 | 0.63 |
| VC395_0970 |      | conserved hypothetical protein                  | O  | 1.20 | 1.14 |
| VC395_0979 | crr  | PTS system, glucose-specific IIA component      | N  | 0.00 | 0.52 |

|            |        |                                                               |    |      |      |
|------------|--------|---------------------------------------------------------------|----|------|------|
| VC395_0982 |        | conserved hypothetical protein                                | N  | 0.00 | 0.64 |
| VC395_1002 | hemH   | ferrochelatase                                                | O  | 3.10 | 0.56 |
| VC395_1012 | glnS   | glutaminyl-tRNA synthetase                                    | O  | 0.00 | 0.29 |
| VC395_1022 |        | conserved hypothetical protein                                | O  | 2.17 | 0.95 |
| VC395_1102 |        | response regulator                                            | O  | 2.46 | 0.51 |
| VC395_1103 |        | sensor histidine kinase                                       | O  | 0.00 | 0.38 |
| VC395_1121 |        | preprotein translocase SecA subunit-related protein           | O  | 4.00 | 0.95 |
| VC395_1297 |        | conserved hypothetical protein                                | O  | 0.00 | 1.15 |
| VC395_1298 |        | pseudouridine synthase family 1 protein                       | O  | 0.00 | 0.78 |
| VC395_1303 |        | NifS-related protein                                          | O  | 2.77 | 1.06 |
| VC395_1340 |        | conserved hypothetical protein                                | O  | 0.00 | 2.14 |
| VC395_1342 |        | conserved hypothetical protein                                | O  | 0.00 | 2.30 |
| VC395_1344 |        | conserved hypothetical protein                                | O  | 0.00 | 1.89 |
| VC395_1346 |        | conserved hypothetical protein                                | O  | 1.05 | 1.81 |
| VC395_1349 |        | conserved hypothetical protein                                | O  | 0.00 | 2.13 |
| VC395_1364 |        | putative vitamin B12 ABC transporter, ATP-binding protein Btu | O  | 1.34 | 0.84 |
| VC395_1399 |        | conserved hypothetical protein                                | O  | 3.86 | 0.61 |
| VC395_1415 | thiD   | phosphomethylpyrimidine kinase                                | O  | 3.80 | 1.33 |
| VC395_1442 |        | conserved hypothetical protein                                | O  | 0.00 | 1.37 |
| VC395_1449 |        | conserved hypothetical protein                                | O  | 1.87 | 0.67 |
| VC395_1450 |        | conserved hypothetical protein                                | O  | 2.14 | 1.63 |
| VC395_1497 |        | conserved hypothetical protein                                | O  | 1.80 | 1.35 |
| VC395_1520 | cheB-1 | protein-glutamate methylesterase CheB                         | O  | 3.70 | 0.59 |
| VC395_1525 |        | methyl-accepting chemotaxis protein                           | O  | 2.32 | 0.61 |
| VC395_1539 |        | conserved hypothetical protein                                | MO | 3.84 | 0.75 |

|            |      |                                                            |    |      |      |
|------------|------|------------------------------------------------------------|----|------|------|
| VC395_1548 | potA | spermidine/putrescine ABC transporter, ATP-binding protein | MO | 1.93 | 0.56 |
| VC395_1560 | ccoQ | cytochrome c oxidase, subunit CcoQ                         | O  | 0.00 | 1.45 |
| VC395_1565 |      | sensor histidine kinase/response regulator                 | O  | 1.76 | 0.36 |
| VC395_1615 |      | conserved hypothetical protein                             | MN | 3.79 | 0.95 |
| VC395_1676 |      | conserved hypothetical protein                             | M  | 0.00 | 1.70 |
| VC395_1677 | perA | catalase/oxidase                                           | M  | 2.07 | 0.29 |
| VC395_1679 |      | beta-lactamase-related protein                             | O  | 0.00 | 0.35 |
| VC395_1685 |      | conserved hypothetical protein                             | O  | 0.00 | 1.05 |
| VC395_1688 |      | conserved hypothetical protein                             | O  | 0.51 | 0.63 |
| VC395_1691 |      | conserved hypothetical protein                             | O  | 3.22 | 0.58 |
| VC395_1692 |      | conserved hypothetical protein                             | O  | 0.66 | 1.13 |
| VC395_1695 |      | enterobactin synthetase component F-related protein        | O  | 0.00 | 0.30 |
| VC395_1700 | ankB | ankB protein                                               | N  | 3.82 | 0.66 |
| VC395_1703 |      | conserved hypothetical protein                             | N  | 0.35 | 0.71 |
| VC395_1731 |      | conserved hypothetical protein                             | O  | 0.00 | 0.32 |
| VC395_1745 |      | conserved hypothetical protein                             | O  | 3.86 | 0.30 |
| VC395_1803 |      | conserved hypothetical protein                             | O  | 3.12 | 0.41 |
| VC395_1814 |      | DNA-binding protein inhibitor Id-2-related protein         | O  | 3.33 | 0.79 |
| VC395_1815 |      | conserved hypothetical protein                             | O  | 1.04 | 1.21 |
| VC395_1818 | yciB | intracellular septation protein A                          | O  | 3.90 | 0.81 |
| VC395_1839 |      | conserved hypothetical protein                             | O  | 1.88 | 0.52 |
| VC395_1845 |      | conserved hypothetical protein                             | N  | 0.00 | 1.34 |
| VC395_1847 |      | conserved hypothetical protein                             | NO | 3.98 | 1.12 |
| VC395_1849 |      | conserved hypothetical protein                             | O  | 2.56 | 0.97 |
| VC395_1850 |      | conserved hypothetical protein                             | O  | 0.00 | 0.84 |

|            |        |                                                  |   |      |      |
|------------|--------|--------------------------------------------------|---|------|------|
| VC395_1851 | aat    | leucyl/phenylalanyl-tRNA-protein transferase     | O | 2.13 | 0.43 |
| VC395_1852 |        | arginyl-tRNA-protein transferase-related protein | O | 1.90 | 0.39 |
| VC395_2020 | ald    | alanine dehydrogenase                            | O | 0.00 | 0.62 |
| VC395_2021 |        | conserved hypothetical protein                   | O | 1.84 | 0.57 |
| VC395_2026 | pyrF   | orotidine 5`-phosphate decarboxylase             | O | 0.00 | 0.86 |
| VC395_2046 |        | conserved hypothetical protein                   | O | 0.00 | 0.47 |
| VC395_2060 |        | FAD monooxygenase, PheA/TfdB family              | O | 1.68 | 0.59 |
| VC395_2094 | dgt    | deoxyguanosinetriphosphate triphosphohydrolase   | O | 0.00 | 0.64 |
| VC395_2098 |        | putative peptidase                               | O | 2.46 | 0.54 |
| VC395_2101 |        | putative serine hydrolase                        | O | 1.11 | 1.01 |
| VC395_2106 |        | conserved hypothetical protein                   | O | 0.00 | 1.58 |
| VC395_2116 |        | conserved hypothetical protein                   | O | 1.84 | 0.56 |
| VC395_2117 |        | conserved hypothetical protein                   | O | 0.93 | 0.62 |
| VC395_2224 |        | conserved hypothetical protein                   | O | 3.67 | 0.56 |
| VC395_2227 |        | conserved hypothetical protein                   | O | 3.73 | 1.20 |
| VC395_2244 | fliI   | flagellum-specific ATP synthase FliI             | O | 1.82 | 0.81 |
| VC395_2267 |        | D,D-carboxypeptidase-related protein             | O | 2.54 | 0.73 |
| VC395_2268 |        | conserved hypothetical protein                   | O | 0.00 | 1.15 |
| VC395_2269 |        | conserved hypothetical protein                   | O | 0.00 | 1.29 |
| VC395_2287 |        | conserved hypothetical protein                   | O | 0.00 | 1.27 |
| VC395_2292 | hemK   | hemK protein                                     | O | 0.40 | 1.84 |
| VC395_2317 | cheR-2 | chemotaxis protein methyltransferase CheR        | O | 2.34 | 1.30 |
| VC395_2431 |        | conserved hypothetical protein                   | O | 0.00 | 1.08 |
| VC395_2459 |        | conserved hypothetical protein                   | N | 0.00 | 0.30 |
| VC395_2480 |        | conserved hypothetical protein                   | O | 3.89 | 1.00 |

|             |        |                                                      |   |      |      |
|-------------|--------|------------------------------------------------------|---|------|------|
| VC395_2482  |        | conserved hypothetical protein                       | O | 0.00 | 0.93 |
| VC395_2544  |        | conserved hypothetical protein                       | O | 2.36 | 1.14 |
| VC395_2549  |        | conserved hypothetical protein                       | O | 1.41 | 1.68 |
| VC395_2565  | mazG   | mazG protein                                         | O | 3.11 | 0.51 |
| VC395_2572  | acpS   | holo-(acyl-carrier-protein) synthase                 | O | 2.82 | 1.33 |
| VC395_2585  |        | conserved hypothetical protein                       | O | 0.66 | 1.25 |
| VC395_2623  |        | conserved hypothetical protein                       | O | 1.11 | 2.44 |
| VC395_2635  |        | conserved hypothetical protein                       | O | 0.00 | 2.72 |
| VC395_2638  |        | 3-deoxy-D-manno-octulosonate 8-phosphate phosphatase | O | 1.83 | 0.88 |
| VC395_2653  |        | conserved hypothetical protein                       | O | 0.00 | 1.35 |
| VC395_2656  |        | conserved hypothetical protein                       | O | 0.00 | 1.43 |
| VC395_2670  | cysC   | adenylylsulfate kinase                               | O | 3.77 | 1.16 |
| VC395_2680  | fkfB   | peptidyl-prolyl cis-trans isomerase, FKBP-type       | O | 2.96 | 0.92 |
| VC395_2689  | secY   | preprotein translocase, SecY subunit                 | O | 1.86 | 0.62 |
| VC395_2690  | rplO   | ribosomal protein L15                                | O | 0.00 | 1.67 |
| VC395_2717  | slyD   | peptidyl-prolyl cis-trans isomerase, FKBP-type       | O | 3.85 | 0.78 |
| VC395_2725  |        | conserved hypothetical protein                       | O | 3.18 | 1.46 |
| VC395_2810  |        | GGDEF family protein                                 | O | 0.73 | 0.29 |
| VC395_2812  | dcuA   | C4-dicarboxylate transporter, anaerobic              | M | 1.06 | 0.29 |
| VC395_0187  | atpF   | ATP synthase F0, B subunit                           | M | 2.54 | 0.29 |
| VC395_0181  | gidB   | glucose inhibited division protein B                 | O | 0.00 | 0.30 |
| VC395_A0015 | vgrG-2 | vgrG protein                                         | O | 3.83 | 0.20 |
| VC395_A0026 |        | conserved hypothetical protein                       | O | 3.30 | 1.60 |
| VC395_A0048 |        | conserved hypothetical protein                       | O | 0.00 | 0.29 |
| VC395_A0055 |        | conserved hypothetical protein                       | O | 0.00 | 0.83 |

|                    |                                                  |     |      |      |
|--------------------|--------------------------------------------------|-----|------|------|
| VC395_A0068        | conserved hypothetical protein                   | O   | 1.40 | 0.25 |
| VC395_A0069        | conserved hypothetical protein                   | O   | 0.00 | #N/A |
| VC395_A0078        | conserved hypothetical protein                   | O   | 0.00 | 0.11 |
| VC395_A0102        | conserved hypothetical protein                   | O   | 0.00 | 0.23 |
| VC395_A0131        | conserved hypothetical protein                   | O   | 0.00 | 0.56 |
| VC395_A0139        | putative TRAP transporter large permease protein | O   | 0.00 | 0.16 |
| VC395_A0151        | conserved hypothetical protein                   | NO  | 0.00 | 0.38 |
| VC395_A0155        | conserved hypothetical protein                   | MNO | 1.18 | 0.37 |
| VC395_A0165        | conserved hypothetical protein                   | N   | 0.78 | 0.26 |
| VC395_A0169 frnE   | frnE protein                                     | N   | 3.90 | 0.20 |
| VC395_A0806 fruB   | PTS system, fructose-specific IIA/FPR component  | O   | 3.66 | 0.28 |
| VC395_A0801        | aminotransferase, class II                       | O   | 2.06 | 0.23 |
| VC395_A0799        | conserved hypothetical protein                   | O   | 2.35 | 1.05 |
| VC395_A0791 tatA-2 | tatA protein                                     | O   | 0.46 | 0.51 |
| VC395_A0790        | DedA family protein                              | O   | 0.49 | 0.48 |
| VC395_A0789        | conserved hypothetical protein                   | O   | 3.56 | 0.39 |
| VC395_A0786        | cytochrome b561, putative                        | O   | 1.99 | 0.66 |
| VC395_A0778        | conserved hypothetical protein                   | O   | 2.52 | 0.28 |
| VC395_A0743 ddlA   | D-alanine--D-alanine ligase                      | O   | 0.00 | 0.31 |
| VC395_A0733        | conserved hypothetical protein                   | O   | 2.07 | 0.29 |
| VC395_A0732        | conserved hypothetical protein                   | O   | 0.00 | 0.37 |
| VC395_A0689        | conserved hypothetical protein                   | O   | 0.00 | 0.77 |
| VC395_A0671        | conserved hypothetical protein                   | O   | 3.17 | 0.48 |
| VC395_A0669        | conserved hypothetical protein                   | O   | 0.00 | 0.31 |
| VC395_A0661        | conserved hypothetical protein                   | O   | 3.26 | 0.64 |

|             |      |                                                          |    |      |      |
|-------------|------|----------------------------------------------------------|----|------|------|
| VC395_A0657 | cscA | sucrose-6-phosphate dehydrogenase                        | O  | 3.61 | 0.27 |
| VC395_A0656 | cscK | fructokinase                                             | O  | 3.16 | 0.58 |
| VC395_A0650 |      | CbbY family protein                                      | O  | 0.00 | 0.38 |
| VC395_A0633 | napB | periplasmic nitrate reductase, cytochrome c-type protein | O  | 3.85 | 0.82 |
| VC395_A0616 |      | conserved hypothetical protein                           | O  | 0.98 | 0.43 |
| VC395_A0599 |      | conserved hypothetical protein                           | N  | 0.00 | 0.24 |
| VC395_A0581 |      | conserved hypothetical protein                           | O  | 0.00 | 0.71 |
| VC395_A0571 |      | conserved hypothetical protein                           | NO | 0.00 | 0.44 |
| VC395_A0567 |      | conserved hypothetical protein                           | NO | 0.00 | 0.69 |
| VC395_A0558 |      | transcriptional regulator, LysR family                   | M  | 3.35 | 0.38 |
| VC395_A0553 |      | conserved hypothetical protein                           | M  | 1.37 | 0.41 |
| VC395_A0545 |      | conserved hypothetical protein                           | MO | 0.93 | 0.51 |
| VC395_A0544 |      | conserved hypothetical protein                           | O  | 0.00 | 0.61 |
| VC395_A0536 |      | conserved hypothetical protein                           | O  | 3.02 | 0.35 |
| VC395_A0534 |      | conserved hypothetical protein                           | O  | 4.00 | 0.20 |
| VC395_A0834 |      | conserved hypothetical protein                           | MO | 0.73 | 0.85 |
| VC395_A0858 |      | conserved hypothetical protein                           | N  | 1.16 | 0.70 |
| VC395_A0866 |      | conserved hypothetical protein                           | O  | 0.00 | 0.96 |
| VC395_A0868 |      | conserved hypothetical protein                           | O  | 0.00 | 1.33 |
| VC395_A0890 |      | conserved hypothetical protein                           | O  | 2.09 | 0.61 |
| VC395_A0891 | ompW | outer membrane protein OmpW                              | O  | 1.74 | 0.28 |
| VC395_A0918 |      | conserved hypothetical protein                           | N  | 0.00 | 0.55 |
| VC395_A0933 | hutX | hutX protein                                             | N  | 0.00 | 0.42 |
| VC395_A0939 | hutC | putative heme ABC transporter, permease protein          | N  | 0.00 | 0.33 |
| VC395_A0941 |      | conserved hypothetical protein                           | N  | 1.99 | 0.56 |



|                  |                                            |   |      |      |
|------------------|--------------------------------------------|---|------|------|
| VC395_A0944      | conserved hypothetical protein             | N | 0.00 | 0.59 |
| VC395_A0957      | conserved hypothetical protein             | N | 2.18 | 0.44 |
| VC395_A0960      | conserved hypothetical protein             | N | 0.00 | 0.63 |
| VC395_A0961      | conserved hypothetical protein             | N | 2.77 | 0.22 |
| VC395_A0964      | sensory box/GGDEF family protein           | N | 2.13 | 0.31 |
| VC395_A0989      | putative glycine cleavage operon activator | M | 2.75 | 0.53 |
| VC395_A0993      | conserved hypothetical protein             | M | 0.00 | 0.96 |
| VC395_A0998      | conserved hypothetical protein             | M | 0.37 | 0.86 |
| VC395_A1001      | conserved hypothetical protein             | O | 0.00 | 0.57 |
| VC395_A1016 grx2 | glutaredoxin 2                             | O | 1.73 | 0.54 |
| VC395_A1019      | conserved hypothetical protein             | O | 0.47 | 1.33 |
| VC395_A1101 pdxH | pyridoxamine 5`-phosphate oxidase          | O | 0.00 | 0.61 |

#### Footnote:

\* This column indicates the lineage in which the recombination occurred.

† The expression data was from Bina et al.[1] and the data is the ratio of cDNA of the stool samples and genomic DNA. #N/A in this column means that no expression data can be obtained.

1. Bina J, Zhu J, Dziejman M, Faruque S, Calderwood S, et al. (2003) ToxR regulon of *Vibrio cholerae* and its expression in vibrios shed by cholera patients. *Proc Natl Acad Sci U S A* 100: 2801-2806.
