# Supplementary material for: A Recalibrated Molecular Clock and Independent Origins for the Cholera Pandemic Clones
Source: PLOS journal article supplement (doi:10.1371/journal.pone.0004053), 2008-12-29
Supplement: S16 (10.1371/journal.pone.0004053.s016) [file journal.pone.0004053.s016]

**Table S8. Corrections to N16961 genome sequence**

| <b>chromosome</b> | <b>location</b> | <b>gene location</b>   | <b>original base</b> | <b>corrected base</b> |
|-------------------|-----------------|------------------------|----------------------|-----------------------|
| Large             | 424629          | <i>VC0398</i>          | G                    | T                     |
| Large             | 424645          | <i>VC0398</i>          | A                    | GA                    |
| Large             | 424670          | <i>VC0398</i>          | G                    | none                  |
| Large             | 638169          | <i>VC0607</i>          | C                    | TC                    |
| Large             | 998435          | <i>VC0933 (VC0932)</i> | T                    | CT                    |
| Large             | 1228191         | <i>VC1157 (VC1156)</i> | C                    | CC                    |
| Large             | 1335598         | <i>VC1261</i>          | A                    | G                     |
| Large             | 1618601         | <i>VC1504 (VC1505)</i> | C                    | CC                    |
| Large             | 1625933         | <i>VC1513</i>          | C                    | CC                    |
| Large             | 1649049         | <i>VC1536 (VC1535)</i> | C                    | none                  |
| Large             | 1676600         | <i>VC1563(VC1564)</i>  | C                    | CC                    |
| Large             | 1676703         | <i>VC1563(VC1564)</i>  | G                    | CGA                   |
| Large             | 1748765         | <i>VC1625</i>          | T                    | CT                    |
| Large             | 1875074         | <i>VC1739 (VC1738)</i> | T                    | TT                    |
| Large             | 1900854         | <i>VC1761 (VC1760)</i> | T                    | none                  |
| Large             | 2489046         | <i>VC2338</i>          | G                    | GG                    |
| Large             | 2262543         | <i>VC2105 (VC2104)</i> | T                    | none                  |
| Large             | 2266655         | <i>VC2109</i>          | C                    | CC                    |
| Large             | 2318560         | <i>VC2173</i>          | G                    | none                  |
| Large             | 2657595         | <i>VC2477 (VC2476)</i> | T                    | CT                    |
| Large             | 2738434         | <i>VC2556 (VC2557)</i> | T                    | CT                    |
| Large             | 2907037         | <i>VC2733</i>          | G                    | GG                    |
| Large             | 335660          | <i>VC0321</i>          | G                    | C*                    |
| Large             | 553569          | <i>VC0518</i>          | C                    | CC*                   |
| Large             | 555404          | <i>VC0521</i>          | G                    | GG*                   |
| Large             | 663766          | <i>VC0624</i>          | T                    | A*                    |
| Large             | 849965          | <i>VC0793m</i>         | G                    | GG*                   |
| Large             | 1087962         | <i>VC1018</i>          | T                    | GT*                   |
| Large             | 1183050         | <i>VC1113</i>          | A                    | G*                    |
| Large             | 1237259         | <i>VC1165</i>          | C                    | G*                    |
| Large             | 1237260         | <i>VC1165</i>          | G                    | C*                    |
| Large             | 1389484         | <i>VC1307</i>          | C                    | CC*                   |
| Large             | 1486534         | <i>VC1395</i>          | C                    | CC*                   |
| Large             | 2076300         | <i>VC1925</i>          | A                    | G*                    |
| Large             | 2153724         | <i>VC2001</i>          | T                    | A*                    |
| Large             | 2179341         | <i>VC2027</i>          | C                    | G*                    |
| Large             | 2358194         | <i>VC2209</i>          | C                    | CC*                   |
| Large             | 2379972         | <i>VC2225</i>          | A                    | G*                    |
| Large             | 2612864         | <i>VC2437</i>          | C                    | CC*                   |
| Large             | 2881400         | <i>VC2710</i>          | C                    | A*                    |

|       |         |                                  |                |                |
|-------|---------|----------------------------------|----------------|----------------|
| Large | 162660  | VC0165                           | N              | C*             |
| Large | 172531  | VC0172                           | K              | T*             |
| Large | 364992  | VC0343                           | K              | G*             |
| Large | 854836  | VC0798                           | K              | G*             |
| Large | 1011632 | VC0947                           | W              | A*             |
| Large | 1561424 | VC1451                           | K              | G*             |
| Large | 1561926 | VC1451                           | S              | C*             |
| Large | 1561942 | VC1451                           | S              | G*             |
| Large | 1561949 | VC1451                           | W              | A*             |
| Large | 1587146 | VC1482                           | K              | G*             |
| Large | 1587147 | VC1482                           | Y              | T*             |
| Large | 1587148 | VC1482                           | Y              | C*             |
| Large | 1587149 | VC1482                           | Y              | T*             |
| Large | 1587765 | VC1482                           | W              | T*             |
| Large | 1696639 | VC1585                           | Y              | C*             |
| Large | 1696645 | VC1585                           | Y              | C*             |
| Large | 2122955 | VC1971                           | R              | G*             |
| Large | 2122956 | VC1971                           | M              | C*             |
| Large | 2378839 | VC2224                           | N              | G*             |
| Large | 2590300 | VC2416                           | R              | A*             |
| Large | 2682957 | VC2497                           | R              | G*             |
| Large | 2682978 | VC2497                           | S              | G*             |
| Large | 764702  | <i>between 16S and 23S</i>       | K              | G <sup>†</sup> |
| Large | 57690   | 23S                              | Y              | C <sup>†</sup> |
| Large | 57714   | 23S                              | K              | G <sup>†</sup> |
| Large | 167458  | <i>tRNA-pro</i>                  | R              | G <sup>†</sup> |
| Large | 328674  | 23S                              | Y              | C <sup>†</sup> |
| Large | 1670764 | <i>between VC1558 and VC1559</i> | W              | T <sup>†</sup> |
| Large | 1735241 | VC1620( <i>pseudogene</i> )      | M              | C <sup>†</sup> |
| Large | 764715  | <i>between 16S and 23S</i>       | R <sup>§</sup> |                |
| Large | 2681238 | 16S                              | R <sup>§</sup> |                |
| Large | 2928036 | <i>between 5S and 23S</i>        | K <sup>§</sup> |                |
| Large | 2928147 | 23S                              | W <sup>§</sup> |                |
| Small | 17393   | VCA0015 (VCA0016)                | C              | none           |
| Small | 53608   | VCA0044 (VCA0045)                | T              | none           |
| Small | 57465   | VCA0049 (VCA0050)                | C              | GC             |
| Small | 144626  | VCA0129                          | A              | none           |

|       |         |                        |   |       |
|-------|---------|------------------------|---|-------|
| Small | 186168  | VCA0168 (VCA0169,0170) | G | GG    |
| Small | 186754  | VCA0168 (VCA0169,0170) | C | none  |
| Small | 186755  | VCA0168 (VCA0169,0170) | C | none  |
| Small | 186759  | VCA0168 (VCA0169,0170) | G | none  |
| Small | 186760  | VCA0168 (VCA0169,0170) | G | none  |
| Small | 255374  | VCA0232                | G | GG    |
| Small | 277301  | VCA0257                | A | G     |
| Small | 279450  | VCA0260 (VCA0261)      | C | CC    |
| Small | 299055  | VCA0280                | G | none  |
| Small | 299080  | VCA0280                | C | none  |
| Small | 474527  | VCA0537                | C | CC    |
| Small | 535094  | VCA0596 (VCA0597)      | G | none  |
| Small | 686744  | VCA0740a               | T | CT    |
| Small | 969852  | VCA1022 (VCA1023)      | T | TT    |
| Small | 1036512 | VCA1082 (VCA1083)      | C | GC    |
| Small | 1062459 | VCA1106 (VCA1107)      | C | GC    |
| Small | 294983  | VCA0276                | G | GG*   |
| Small | 85485   | VCA0076                | T | G*    |
| Small | 152561  | VCA0137                | C | A*    |
| Small | 161478  | VCA0146                | C | G*    |
| Small | 472297  | VCA0534                | A | none* |
| Small | 566512  | VCA0629                | C | G*    |
| Small | 566513  | VCA0629                | G | C*    |
| Small | 588148  | VCA0653                | C | G*    |
| Small | 609601  | VCA0674                | C | GC*   |
| Small | 631352  | VCA0692                | C | GC*   |
| Small | 631405  | VCA0692                | G | GG*   |
| Small | 690275  | VCA0745                | A | none* |
| Small | 889858  | VCA0938                | T | GT*   |
| Small | 901045  | VCA0951                | C | T*    |
| Small | 980511  | VCA1031                | C | G*    |
| Small | 980512  | VCA1031                | G | C*    |
| Small | 980632  | VCA1031                | C | G*    |
| Small | 980633  | VCA1031                | G | C*    |
| Small | 980877  | VCA1031                | G | none* |
| Small | 980887  | VCA1031                | T | GT*   |
| Small | 981512  | VCA1031                | A | none* |
| Small | 993674  | VCA1043                | C | none* |
| Small | 993684  | VCA1043                | C | A     |
| Small | 993700  | VCA1043                | C | none* |
| Small | 993701  | VCA1043                | T | none* |
| Small | 1004685 | VCA1055                | T | G*    |
| Small | 1045002 | VCA1089                | G | GG*   |

|       |         |                                    |                |     |
|-------|---------|------------------------------------|----------------|-----|
| Small | 1060870 | <i>VCA1104</i>                     | T              | CT* |
| Small | 1060888 | <i>VCA1104</i>                     | T              | CT* |
| Small | 646810  | <i>VCA0705</i>                     | Y              | T*  |
| Small | 366180  | <i>VCA0387</i>                     | Y              | C*  |
| Small | 413177  | <i>VCA0464</i>                     | R              | A*  |
| Small | 356433  | <i>between VCA0368 and VCA0369</i> | Y <sup>¶</sup> |     |

---

\* In each case the base has been corrected to that obtained from the N16961 ORF clone collection submitted by the Harvard Institute of Proteomics to the NCBI web site and confirmed by the unfinished MO10 genome.

† In each case the M66-2 and O395 base at the position are the same and consistent with the N16961 IUPAC base, and N16961 was corrected to the M66-2/O395 base.

§ For these 4 bases in the large chromosome, 2 are in a region absent in M66-2 and the other 2 are different at the position for both M66-2 and O395. However all are consistent with the N16961 IUPAC base. Because the 4 are in *rrn* regions, it is difficult to determine the corresponding region in other uncompleted *Vibrio* genomes, and the IUPAC codes were not changed. The ambiguity had no influence on our conclusions as SNPs in *rrn* regions were not used in SNP analysis.

¶ Base is in intergenic region (so no Harvard Institute clone data) in a N16961-specific region (relative to M66-2 and O395) of the integron, so can not be corrected. The ambiguity had no influence on our conclusions as SNPs in this region not scored.

others were corrected by resequencing.
